# Supplementary material
Source: PubMed Central journal article supplement (PMC5894337)
Supplement: NIHMS909823-supplement-2.pdf [file NIHMS909823-supplement-2.pdf]

|                       | Non-CBC samples | CBC samples |
|-----------------------|-----------------|-------------|
| MS2 ID rate           | 0.75            | 2.16        |
| MS2/MBR mixed ID rate | 1.05            | 2.16        |
| ID by MBR only rate   | 3.40            | 5.68        |
| No observations       | 94.80           | 90.00       |
